# Supplementary material for: Anxiety, depression and other internalizing problems of young children in low and middle-income countries before the covid-19 pandemic
Source: Research Square preprint supplement (doi:10.21203/rs.3.rs-5006281/v1), 2024-09-04
Supplement: Supplementary file 1 [file afff1b0813da253e63e4c9ad.docx]

**Table 1. Studies in the Region of the Americas**

| Lacunza (2011) | **Country** | Argentina |
| --- | --- | --- |
| **Language** | Spanish |
| **Aims of Study** | To establish if the existence of social skills reduces the frequency of externalizing and internalizing problems. |
| **Type of Study** | Cross-sectional study |
| **Sample** | 185 children aged 5 years old, of high or low SES and their parents |
| **Internalizing Problems** | Total score for behavioral inhibition |
| **Associations, comparisons, or pathways examined** | Correlations with social skills and comparisons based on Sex |
| **Instrument** | Escala de Habilidades Sociales (Social skills scale) |
| **Main Findings on Internalizing Problems** | 40% of the children had behavioral inhibition. No significant differences by Sex in behavioral inhibition. Children with behavioral inhibition have deficit in social skills. |
| **Confounders** | Not assessed |
| **Quality Assessment** | Poor |
| Reyna and Brussino (2009) | **Country** | Argentina |
| **Language** | Spanish |
| **Aims of Study** | To analyze the psychometric properties of the Preschool and Kindergarten Behavior Scales in a sample of Argentinean children from 3 to 7 years old, and to obtain a reduced version of the scale with adequate psychometric properties for use as a screening tool |
| **Type of Study** | Cross-sectional study |
| **Sample** | EFA 208, CFA 184 children aged 3 to 7 years old, and their parents. |
| **Internalizing Problems** | Score of Internalizing problems based on two scales: social isolation, anxiety/somatic problems. |
| **Associations, comparisons, or pathways examined** | Exploratory and Confirmatory Factor Analyses of the Behavioral Problems Scale |
| **Instrument** | Preschool and Kindergarten Behavior Scales |
| Reyna and Brussino (2009) (cont). | **Main Findings on Internalizing Problems** | Behavioral problems are best explained by two factors: externalizing and internalizing problems. The level of internal consistency of the internalizing problems subscale was relatively low (Cronbach's alpha=0.67) |
| **Confounders** | Not assessed |
| **Quality Assessment** | Fair |
| El Rafihi-Ferreira et al. (2016) | **Country** | Brazil |
| **Language** | Portuguese |
| **Aims of Study** | To evaluate the relationship between internalizing and externalizing problems and sleep problems in children of pre-school age |
| **Type of Study** | Cross-sectional study |
| **Sample** | 83 children between 2 and 5 years old, and their mothers in a psychology service |
| **Internalizing Problems** | Internalizing Problems yes/no |
| **Associations, comparisons, or pathways examined** | Correlations with all symptoms of sleep disturbance |
| **Instrument** | CBCL 1.5-5 |
| **Main Findings on Internalizing Problems** | 64 (77%) children had internalizing problems Children with sleep disturbance: 40% higher risk of internalizing problems than those without child sleep disturbance (RP = 1.4; IC 95% = 1.14-1.67) |
| **Confounders** | Not assessed |
| **Quality Assessment** | Fair |
| Lins and Alvarenga (2015) | **Country** | Brazil |
| **Language** | Portuguese |
| **Aims of Study** | To investigate relations between maternal psychological control, behavior control, and internalizing problems of preschool children |
| **Type of Study** | Cross-sectional study |
| **Sample** | 103 children aged 3 to 5 years old and their parents |
| **Internalizing Problems** | Total score for internalizing problems and for each syndrome |
| Lins and Alvarenga (2015) (cont.) | **Associations, comparisons, or pathways examined** | Associations with sociodemographic characteristics and maternal control |
| **Instrument** | CBCL 1.5-5 |
| **Main Findings on Internalizing Problems** | Prevalence of clinically significant symptoms was 28.2% Total internalizing problems, emotional reactivity, and anxiety/depression: negatively correlated with maternal age, paternal age, and number of siblings. Somatic complaints: negatively associated with maternal age. Withdrawn: negatively associated with maternal education. Anxiety/depression and withdrawn: negatively associated with controlling criticism in the mothers. |
| **Confounders** | Not assessed |
| **Quality Assessment** | Fair/Good |
| Matijasevich et al. (2014) | **Country** | Brazil |
| **Language** | English |
| **Aims of Study** | To investigate changes in preschool behavioral/emotional problems in two birth cohorts from a middle-income country born 11 years apart. |
| **Type of Study** | Cross-sectional study |
| **Sample** | Mothers' reports of a subsample of 4-year olds from the 1993 cohort (634) and all 4-year olds from the 2004 cohort (3,750) from the Pelotas cohort studies. |
| **Internalizing Problems** | Total score for internalizing problems, for each syndrome and classification into clinical or non-clinical range. |
| **Associations, comparisons, or pathways examined** | Comparisons of prevalence in two cohorts. |
| **Instrument** | CBCL 4-18 |
| Matijasevich et al. (2014) (cont.) | **Main Findings on Internalizing Problems** | Substantial increases were detected in internalizing problems (10% approximately), in mean somatic complaints, and thought problems (only among girls). No significant differences in the withdrawn, anxious/depressed, social problems between the two cohorts. CBCL total: affected by maternal schooling, marital status, maternal age, maternal smoking during pregnancy and maternal psychiatric problems. The internalizing problem score was additionally affected by parity.  Girls: higher scores than boys in the anxious depressed syndrome but lower scores in the externalizing problems.  Changes in SES affected the anxious/ depressed syndrome. Higher in 2004 than in 1993. | |
| **Confounders** | Age at time of testing; family socioeconomic position; maternal characteristics (marital status, maternal age, parity, maternal smoking during pregnancy); child characteristics (low birthweight and multiple pregnancy), maternal employment and maternal psychiatric problems. | |
| **Quality Assessment** | Good | |
| Pearson et al. (2019) | **Country** | Brazil | |
| **Language** | English | |
| **Aims of Study** | To examine the impact of grandmothers’ emotional symptoms on internalizing and externalizing symptoms in grandchildren from a three-generation birth cohort study | |
| **Type of Study** | Cohort Study | |
| **Sample** | 92 children aged 4 years old, parents and grandmothers | |
| **Internalizing Problems** | Total score for internalizing symptoms | |
| **Associations, comparisons, or pathways examined** | Mediation by mother internalizing problems | |
| **Instrument** | Self-reported questionnaire (SRQ) for internalization in grandmothers and parents. CBCL 1.5-5 for children internalization | |
| **Main Findings on Internalizing Problems** | The relationship between internalizing problems in grandmothers is partially mediated by internalizing problems in the mother. | |
| **Confounders** | Parental and socioeconomic characteristics identified in previous studies as potential confounding variables | |
| **Quality Assessment** | Fair | |

| Santos et al. (2015) | **Country** | Brazil |
| --- | --- | --- |
| **Language** | English |
| **Aims of Study** | To identify the prevalence of internalizing and externalizing behavior problems among preschoolers and their associations with maternal mental health and family characteristics. |
| **Type of Study** | Cross-sectional study |
| **Sample** | 349 children aged 49 to 72 months, and their mothers |
| **Internalizing Problems** | Frequency of clinical/non-clinical syndromes, frequency of internalizing problems |
| **Associations, comparisons, or pathways examined** | Associations between internalizing problems and maternal psychopathology and family characteristics (absent father, income, mother-child interaction, number of children under 5, number of people per room) |
| **Instrument** | CBCL |
| **Main Findings on Internalizing Problems** | Prevalence of internalizing problems: 9.7%. |
| The most common internalizing syndrome: withdrawn (12.6%). Absent father was the only risk factor associated with internalizing problems. Psychopathology in the mother was not associated with child internalization, only with externalization. |
| **Confounders** | Family income, schooling, age, marital status, skin color, parity, mood depression symptoms and smoking during pregnancy, and type of delivery. |
| **Quality Assessment** | Fair |
| Santos et al. (2017) | **Country** | Brazil |
| **Language** | English |
| **Aims of Study** | To study the effect of bed-sharing with the mother over the child mental health. |
| **Type of Study** | Cohort Study |
| **Sample** | 3583 children followed from birth to 6 years of age, and their mothers |
| **Internalizing Problems** | Internalizing Problems (anxiety and depression) yes/no |
| **Associations, comparisons, or pathways examined** | Associations of internalizing problems with bed sharing: early-onset, late-onset, persistent |
| **Instrument** | The Development and Well-Being Assessment (DAWBA) |

| Santos et al. (2017) (cont.) | **Main Findings on Internalizing Problems** | | Persistent bed-sharers were at increased odds of presenting internalizing problems (OR=2.1; 1.4–3.1), as compared to non bed-sharers, in the adjusted analyses,. Among the early-onset bed-sharers the OR for internalizing problems was 1.6 (1.2–2.1). Among the persistent bed-sharers, the OR for internalizing problems was 2.1(1.4-3.1) |
| --- | --- | --- | --- |
| **Confounders** | | Family income, schooling, age, marital status, skin color, parity, mood depression symptoms and smoking during pregnancy, and type of delivery. |
| **Quality Assessment** | | Fair |
| Cano et al. (2018) | **Country** | | Colombia |
| **Language** | | Spanish |
| **Aims of Study** | | To identify, adapt, and establish evidence for the criterion validity of a screening tool for emotional and behavioral problems in children younger than 6 years old |
| **Type of Study** | | Cross-sectional study |
| **Sample** | | 206 children 1.5-6 years old and their caregivers |
| **Internalizing Problems** | | Validations of the Early Childhood Screening Assessment (ECSA) |
| **Associations, comparisons, or pathways examined** | | Contrast with variables of the CBCL 1.5-5 |
| **Instrument** | | ECSA, CBCL 1.5-5 |
| **Main Findings on Internalizing Problems** | | Three factors explain most of the variance. Common internalizing and externalizing symptoms loaded in more than one factor, not clearly distinguishing between them. |
| **Confounders** | | Not assessed |
| **Quality Assessment** | | Fair /Poor |
| Montoya Arenas et al. (2014) | **Country** | | Colombia |
| **Language** | | Spanish |
| **Aims of Study** | | To describe the cognitive, emotional, and behavioral characteristics, of a sample of 20 preschoolers. |
| **Type of Study** | | Cross-sectional study |
| **Sample** | 20 preschoolers between 3 and 5 years old, and their parents | |
| Montoya Arenas et al. (2014) (cont.) | **Internalizing Problems** | Score for each dimension of internalization | | |
| **Associations, comparisons, or pathways examined** | Description of the scores of internalizing problems as reported by parents and teachers | | |
| **Instrument** | Behavior Assessment System for Children (BASC) | | |
| **Main Findings on Internalizing Problems** | For parents, the main internalizing problem was somatization (mean=46.20) | | |
| For teachers, the main internalizing problem was depression (mean=75.70). Mean scores were higher for teachers than for parents (no estimates) | | |
| **Confounders** | Not assessed | | |
| **Quality Assessment** | Poor | | |
| Corapci et al. (2006) | **Country** | Costa Rica | | |
| **Language** | English | | |
| **Aims of Study** | To examine internalizing behavior problems (anxiety/depression) in early adolescence in relation to adversity in early childhood and child verbal competence | | |
| **Type of Study** | Longitudinal | | |
| **Sample** | 191 Costa Rican children and their mothers, who were recruited in infancy from an urban community and assessed again at 5 and 11–14 years. | | |
| **Internalizing Problems** | Total internalizing score | | |
| **Associations, comparisons, or pathways examined** | Protective role of verbal competence in the relationship between adversity in childhood and internalizing problems in early childhood and early adolescence. | | |
| **Instrument** | CBCL | | |
| **Main Findings on Internalizing Problems** | Verbal IQ moderated the role of early adversity on internalizing problems in early adolescence but not in early childhood, indicating that the same factor may act as either a protective or vulnerability factor in different periods of development. | | |
| **Confounders** | Not assessed | | |
| **Quality Assessment** | Poor | | |

| Albores-Gallo et al. (2016) | **Country** | Mexico |
| --- | --- | --- |
| **Language** | Spanish |
| **Aims of Study** | To investigate the validity and internal consistency of the Mexican version of the CBCL/1.5 -5 |
| **Type of Study** | Cross-sectional study |
| **Sample** | 438 children (62 children suspected to be in the autistic spectrum, 376 not in the autistic spectrum) and their parents, aged 18 months to 6 years old |
| **Internalizing Problems** | Total score for each internalizing problem and for each syndrome |
| **Associations, comparisons, or pathways examined** | Comparisons of clinical vs. Community group |
| **Instrument** | CBCL 1.5-5 and clinical interview |
| **Main Findings on Internalizing Problems** | Internal consistency was high for internalizing problems (alpha=0.89). Test-retest using the interclass correlation coefficient (ICC) ≥0.95. Somatic complaints had higher reliability in boys than in girls. Anxiety and depression had better consistency when considered together. Report by mothers have higher internal consistency than report by fathers. |
| **Confounders** | Not assessed |
| **Quality Assessment** | Fair |
| Gil Rodríguez et al. (2018) | **Country** | Mexico |
| **Language** | Spanish |
| **Aims of Study** | To analyze the association between emotional availability and children’s problems, as well as the differences in the level of child externalizing and internalizing problems according to the interaction patterns. |
| **Type of Study** | Cross-sectional study |
| **Sample** | 60 dyads of mothers and their children aged 4 to 5 years old in two preschools |
| **Internalizing Problems** | Total score for internalizing problems and for each syndrome |
| **Associations, comparisons, or pathways examined** | Variables of emotional availability of the mother and the child |
| **Instrument** | CBCL 1.5-5 |
| Gil Rodríguez et al. (2018) (cont.) | **Main Findings on Internalizing Problems** | The mean score of internalizing problems was 56.38 (SD=9.08). Internalizing problems: inverse associations with child's ability to respond, child's involvement, child's general emotional availability, dyadic emotional availability. Regarding symptoms, withdrawn is inversely associated with child's ability to respond, child's involvement and with child's general emotional availability. Anxiety/depression: inversely associated with ability to respond. |
| **Confounders** | Not assessed |
| **Quality Assessment** | Fair |
| Bárrig Jó and Alarcón Parco (2017) | **Country** | Peru |
| **Language** | Spanish |
| **Aims of Study** | To determine the relationship between, social competence, and behavioral problems in preschoolers |
| **Type of Study** | Cross-sectional study |
| **Sample** | 66 children between 2 and 6 years old, and their mothers in an education center |
| **Internalizing Problems** | Anxiety/ Withdrawn measured with a score |
| **Associations, comparisons, or pathways examined** | Correlations with surgency, negative effect, intentional control |
| **Instrument** | Social Competence and Behavioral Evaluation Scale (SCBE-30) adapted to Spanish |
| **Main Findings on Internalizing Problems** | Surgency is correlated negatively with anxiety. |
| No differences in the anxiety/withdrawal symptoms between boys and girls |
| **Confounders** | Not assessed |
| **Quality Assessment** | Fair |

**Table 2. Studies in the European region**

| Wasserman et al. (2001) | **Country** | Old Yugoslavia |
| --- | --- | --- |
| **Language** | English |
| **Aims of Study** | To examine the contribution of maternal smoking during pregnancy and lead exposure to early child behavior problems |
| **Type of Study** | Cohort Study |
| **Sample** | Mothers with low lead exposure were enrolled since pregnancy, and their 191 children were assessed from 4 to 5 years old. |
| **Internalizing Problems** | Total scores for internalizing problems and for each syndrome |
| **Associations, comparisons, or pathways examined** | Associations between maternal smoking, cumulative lead exposure and child behavior problems |
| **Instrument** | CBCL 1.5-5 |
| **Main Findings on Internalizing Problems** | Prenatal smoking predicted increases in total score, in all subscales except for Somatic Complaints and Anxious/Depressed, and in both the Internalizing and Externalizing factors, with adjustment for both social factors and average lifetime BPb. Somatic Problems: interaction with sex [B= 0.18, S.E. = 0.08, P< .05].  Average lifetime BPb was positively related to the Internalizing factor, with control for both social factors and smoking history, The Sex by lead exposure effect was not significant on the internalizing factors and none of the syndromes. |
| **Confounders** | Child sex, ethnicity (language spoken at home: Albanian, Serbian, Other), home acceptance, and maternal education, age at assessment. |
| **Quality Assessment** | Good |
| Ştefan and Avram (2017) | **Country** | Romania |
| **Language** | English |
| **Aims of Study** | To investigate the relationship between attachment, emotion regulation (ER), and risk for internalizing/externalizing problems in typically developing children |
| **Type of Study** | Cross-sectional study |
| **Sample** | 212 children aged 3 to 5 years old, through reports of their parents and teachers |
| Ştefan and Avram (2017) (cont.) | **Internalizing Problems** | Total score of internalizing problems based on parent report, score based on teacher report, composite score |
| **Associations, comparisons, or pathways examined** | Internalizing problems correlated with age, attachment security, effective emotion regulation strategies, comforting, distraction, problem-solving. A mediation model in which the predictor was attachment security (X), the mediator was effective ER strategies (M). In another model, three mediators were simultaneously introduced in the statistical analyses. The predictor was attachment security (X), the mediators were comforting (M1), distraction (M2), and problem-solving (M3) (i.e., ER strategies which were initially included in the higher-order effective ER strategy to introduce two highly related outcome variables (internalizing and externalizing problems). |
| **Instrument** | CBCL, C-TRF |
| **Main Findings on Internalizing Problems** | Effective ER strategies: inversely associated with the combined teacher and parent ratings of internalizing problems. No effect was found between attachment security and internalizing problems. Indirect effect of attachment security on internalizing problems through effective ER strategies (problem-solving). |
| **Confounders** | Age |
| **Quality Assessment** | Fair |
| (Zeanah et al., 2009) | **Country** | Romania |
| **Language** | English |
| **Aims of Study** | To determine whether removing young children from institutional care and placing them with foster families would reduce psychiatric morbidity at 54 months of age. |
| **Type of Study** | Randomized controlled trial |
| **Sample** | 111 children living in institutions and 59 never institutionalized, and their caregivers or parents enrolled at 6-30 months and examined at about 54 months |
| **Internalizing Problems** | Frequency of Internalizing disorders, depression disorders, anxiety disorders. Number of symptoms |
| **Associations, comparisons, or pathways examined** | Prevalence comparisons between institutionalized vs never institutionalized, and care as usual vs. foster care Comparisons in the number of symptoms of boys and girls |
| **Instrument** | Preschool Age Psychiatric Assessment (PAPA) |

| Zeanah et al. (2009) (cont.) | **Main Findings on Internalizing Problems** | Internalizing disorders: the most prevalent of the psychiatric disorders in all children. In children placed in care as usual, internalizing disorders are more common. In children placed in foster care, externalizing disorders are more common (32.4%). Children with any history of institutional rearing: more psychiatric disorders than children without such a history (53.2% versus 22.0%). Children removed from institutions and placed in foster families: less likely to have internalizing disorders than children who continued with care as usual (22.0% versus 44.2%).  Boys: more symptomatic than girls regardless of their caregiving environment and, unlike girls, had no reduction in total psychiatric symptoms following foster placement |
| --- | --- | --- |
| **Confounders** | Not assessed |
| **Quality Assessment** | Good |
| Kozlova et al. (2019) | **Country** | Russia |
| **Language** | English |
| **Aims of Study** | To examine the contribution of early temperament to mental health in preschool and school years |
| **Type of Study** | Longitudinal |
| **Sample** | 96 children and their parents at age 7.1 months and 7.8 years in urban and rural areas |
| **Internalizing Problems** | Emotional symptoms, peer problems, impact. |
| **Associations, comparisons, or pathways examined** | Early effortful control as predictor of mental health in preschool and school age was. Negative affectivity as predictor of internalizing problems in later childhood. Sensitivity to slight stimuli from the external environment, as predictor of later internalizing problems. The lower-order trait of approach/positive anticipation, as a protective factor for internalizing problems. |
| **Instrument** | Strengths and difficulties questionnaire (SDQ) |
| **Main Findings on Internalizing Problems** | The strongest predictor of mental health in preschool and school age was early effortful control which contributed to both externalizing and internalizing problems |
| **Confounders** | Not assessed |
| **Quality Assessment** | Fair |

| Markovic et al. (2016) | **Country** | Serbia |
| --- | --- | --- |
| **Language** | English |
| **Aims of Study** | To examine rates and distribution of emotional and behavioral problems among 4 to 6-year-old children. Comparisons with US children |
| **Type of Study** | Cross-sectional study |
| **Sample** | 512 children aged 4 to 6 years old and their parents |
| **Internalizing Problems** | Total score for internalizing problems and for each syndrome |
| **Associations, comparisons, or pathways examined** | Differences by Sex and comparisons with US children |
| **Instrument** | CBCL 1.5-5 and the CTRF |
| **Main Findings on Internalizing Problems** | 17% of the children: clinically internalizing symptoms. Internalizing symptom: most common is withdrawn (9.3%) and least common is somatic complaints (2.4%). In the CRTF, Serbian girls: higher scores than Serbian boys. Serbian boys and girls: higher mean scores in somatic complaints than boys and girls in the US. In the CBCL, Serbian girls: higher mean scores in somatic complaints than girls in the US. In the CBCL, Serbian boys and girls: lower mean scores in emotional reactivity than boys and girls in the US. |
| **Confounders** | Not assessed |
| **Quality Assessment** | Fair/Good |
| Erol et al. (2005) | **Country** | Turkey |
| **Language** | English |
| **Aims of Study** | Distribution and prevalence of parent-reported behavioral and emotional problems |
| **Type of Study** | Cross-sectional study |
| **Sample** | Final sample of 598 children aged 2 to 3 years old, and their parents. Nationally representative sample |
| **Internalizing Problems** | Total score for internalizing problems and for each syndrome |
| Erol et al. (2005) (cont.) | **Associations, comparisons, or pathways examined** | Differences by Sex, age, race, urban residence, religion, employment |
| **Instrument** | CBCL 1.5-5 |
| **Main Findings on Internalizing Problems** | Sex differences in the anxious/depressed score (multiple R=0.169), with girls having more problems than boys.  Age differences in the somatic complaints (multiple R=0.169), with younger children having more problems than older children. Children from urban areas: higher score on internalization than children from suburban and rural residence. |
| **Confounders** | Not assessed |
| **Quality Assessment** | Fair |
| Hesapcioglu et al. (2017) | **Country** | Turkey |
| **Language** | English |
| **Aims of Study** | To explore mother’s which psychiatric symptoms are related to child’s internalizing and externalizing problems. |
| **Type of Study** | Cross-sectional study |
| **Sample** | Children aged 4-6 years old. 61 cases, 55 age-matched controls and their mothers. |
| **Internalizing Problems** | Total score for internalizing problems, score for each symptom, and classification in terms of yes/no |
| **Associations, comparisons, or pathways examined** | Association with mother's psychiatric problems |
| **Instrument** | CBCL 4-18 |
| **Main Findings on Internalizing Problems** | Each symptom of internalization in children: positively associated with each psychiatric problem in mothers. Having child internalizing problems: positively associated with all psychiatric problems in mothers. |
| **Confounders** | Not assessed |
| **Quality Assessment** | Poor |

| Karabekiroglu et al.  (2009) | | **Country** | | Turkey | |
| --- | --- | --- | --- | --- | --- |
| **Language** | | English | |
| **Aims of Study** | | To investigate the reliability and validity of the Turkish version of the brief infant–toddler social emotional assessment (BITSEA) in a community sample. | |
| **Type of Study** | | Cross-sectional study | |
| **Sample** | | 462 children aged 12-42 months old, and their parents who applied for immunization in health centers | |
| **Internalizing Problems** | | Total score for problems in BITSEA, total score for internalizing problems in CBCL and classification into clinical/subclinical problems | |
| **Associations, comparisons, or pathways examined** | | Comparison with scores with the CBCL scores and clinical classification | |
| **Instrument** | | The brief infant–toddler social and emotional assessment (BITSEA) and CBCL 2-3 | |
| **Main Findings on Internalizing Problems** | | Mean score for the children in the sample was 6.85 ±4.54, with no differences by age or by Sex. Total score in the BITSEA: correlated with internalizing problems (reported by mothers or fathers) | |
| **Confounders** | | Not assessed | |
| **Quality Assessment** | | Good | |
| Yurdusen et al. (2013) | | | **Country** | | Turkey |
| **Language** | | English |
| **Aims of Study** | | To examine the association between emotional and behavioral problems in preschool children and maternal attitudes |
| **Type of Study** | | Cross-sectional study |
| **Sample** | | 204 preschool children aged between 18 and 71 months and their mothers |
| **Internalizing Problems** | | Total scores for internalizing problems |
| **Associations, comparisons, or pathways examined** | | Association between mother's parental attitudes, well-being measures and child behavior problems |
| Yurdusen et al. (2013) (cont.) | **Instrument** | | | CBCL 1.5-5 | |
| **Main Findings on Internalizing Problems** | | | Mothers’ rejection of their home-making roles and their level of anxiety: associated with their children’s internalizing problems, and these two variables in total accounted for 29% of the variance for the internalizing problems of the children. | |
| **Confounders** | | | Not assessed | |
| **Quality Assessment** | | | Fair | |

**Table 3. Studies in the Western Pacific Region**

| Liang et al. (2019) | **Country** | China |
| --- | --- | --- |
| **Language** | English |
| **Aims of Study** | To examine the associations between infant temperamental withdrawal and behavior problems during toddlerhood and to test the moderating effects of maternal sensitivity to infant distress (MSID), and toddlers’ ability to delay gratification |
| **Type of Study** | Longitudinal |
| **Sample** | 84 children and their mothers from two communities, two daycare centers, and two child healthcare networks, followed from 6 months to 2 years old |
| **Internalizing Problems** | Total score for internalizing problems, classification into clinical/non-clinical concern |
| **Associations, comparisons, or pathways examined** | Effect of Infant temperament withdrawal (fearful affect, shyness, social anxiety, and vigilance) on internalizing problems at 1 and 2 years old (T2 and T3) Moderating effect of MSID and toddler's ability to delay gratification |
| **Instrument** | Infant–Toddler Social and Emotional Assessment (ITSEA) ITSEA including three problem domains of internalization (26 items) |
| **Main Findings on Internalizing Problems** | Infant temperamental withdrawal: positively associated with toddlers’ internalizing problems at 1 year of age. |
| **Confounders** | Internalizing and externalizing problems at T1 |
| **Quality Assessment** | Good |
| Liu and Wang (2015) | **Country** | China |
| **Language** | English |
| **Aims of Study** | To examine the mediating effect of parents’ psychological aggression in the relationship between parenting stress and children’s internalizing and externalizing problem behaviors 1 year later |
| **Type of Study** | Cohort Study |
| **Sample** | 311 two-parent families with preschoolers ages 3-5 years old |
| **Internalizing Problems** | total internalizing score, scores for each syndrome |

| Liu and Wang (2015) (cont.) | **Associations, comparisons, or pathways examined** | Predictive effects of both mothers’ and fathers’ parenting stress on children’s internalizing and externalizing problem behaviors 1 year later testing the mediating role of mothers’ and fathers’ psychological aggression. |
| --- | --- | --- |
| **Instrument** | CBCL |
| **Main Findings on Internalizing Problems** | Correlations among indicators of each latent variable were significant and in the expected direction. Psychological aggression partially mediated the relationship between parenting stress and children’s internalizing and externalizing problem behaviors, only in mothers.  For fathers, no significant direct or indirect effects of parenting stress in children’s internalizing and externalizing problem behaviors were found. |
| **Confounders** | Not assessed |
| **Quality Assessment** | Good |
| Liu et al. (2013) | **Country** | China |
| **Language** | English |
| **Aims of Study** | To examine the association between maternal environmental tobacco smoke (ETS) exposure during pregnancy and child behavior problems. |
| **Type of Study** | Cross-sectional study |
| **Sample** | 646 dyads of mothers and children aged 5-6 years old |
| **Internalizing Problems** | Total internalizing score, non-clinical/borderline/clinical range internalization |
| **Associations, comparisons, or pathways examined** | Internalizing problems associated with child characteristics, and association between ETS exposure (yes vs. no) |
| **Instrument** | CBCL 1.5-5 |
| **Main Findings on Internalizing Problems** | 18% had internalizing problem scores in the borderline/clinical range Internalizing problems in children of ETS exposed mothers were higher than those of children of unexposed mothers, but the difference was not statistically significant. |
| **Confounders** | Child sex and school area; parental education, occupation, and psychopathologic problems; maternal age during pregnancy; and father’s current (postnatal) smoking status, |
| **Quality Assessment** | Good |
| J. Liu et al. (2014a) | **Country** | China |
| **Language** | English |
| **Aims of Study** | To investigate whether micronutrient deficiencies, specifically blood zinc and iron levels, will be associated with increased behavior problem scores, including internalizing and externalizing behaviors |
| **Type of Study** | Cohort Study |
| **Sample** | 1,314 children ages 3-5 years old and their parents until their last months of preschool |
| **Internalizing Problems** | Total internalizing score |
| **Associations, comparisons, or pathways examined** | Behavioral outcomes regressed on low zinc and iron group |
| **Instrument** | CBCL 1.5-5 |
| **Main Findings on Internalizing Problems** | Low zinc: association with total behavioral problems. Model of internalizing score regressed on combined low zinc and iron showed living in the suburbs to be positively associated with internalizing problems. |
| **Confounders** | Family size, Sex, house size, mother’s education |
| **Quality Assessment** | Good |
| Jianghong Liu et al. (2014b)  Jianghong Liu et al. (2014b) (cont.) | **Country** | China |
| **Language** | English |
| **Aims of Study** | To examine the association between blood lead concentrations and behavioral problems in a community sample of Chinese preschool children |
| **Type of Study** | Prospective cohort study |
| **Sample** | 1,341 children at ages 3-5 years and their parents |
| **Internalizing Problems** | Total internalizing score, scores for each syndrome, five DSM oriented scales |
| **Associations, comparisons, or pathways examined** | Increase in score of internalizing problems with blood lead concentrations. Associations between blood lead and clinical behavioral problems. |
| **Instrument** | CBCL 1.5-5/C-TRF (Caregiver- Teacher Report Form) |
| **Main Findings on Internalizing Problems** | Blood lead concentration: harmful associations with scores on emotional, anxiety and pervasive developmental problems.  One µg/dL increase of blood lead concentration resulted in a 0.32 and 0.25 increase of behavior scores on emotional reactivity, anxiety/depressed and pervasive developmental problems.  Behavior scores for internalizing problems increased with blood lead concentration for girls at age 5 years (p=0.04) and age 4 years (p=0.048)  Behavior scores slightly increased with blood lead concentration for boys at age 5 years and slightly decreased for boys at age 4 years. Blood lead concentration: associated with increased odds for emotionally reactive (OR=1.10, 95%CI=1.02 – 1.19), anxious/depressed (OR=1.12, 95%CI=1.03 – 1.23), total internalizing problems (OR= 1.10, 95%CI= (1.03 – 1.18), and DSM-oriented anxiety (OR=1.10, 95%CI= 1.01 – 1.19) |
| **Confounders** | Age at blood lead test, sex, residence, father’s education, mother’s education, father’s occupation, parents’ marital status, single child, and IQ |
| **Quality Assessment** | Good |

**Table 4. Studies in Africa and in more than one region**

| Rotheram-Fuller et al. (2018) | **Country** | South Africa |
| --- | --- | --- |
| **Language** | English |
| **Aims of Study** | To examine the consequences of maternal depressed mood on children’s growth, health, cognitive and language development over the first three years of life. |
| **Type of Study** | Randomized controlled trial |
| **Sample** | 1,238 pregnant mothers and their children over the first three years of their lives. |
| **Internalizing Problems** | Score for internalizing problems, classification into internalizing score deviant (yes/no) |
| **Associations, comparisons, or pathways examined** | Comparisons of a standard of care intervention when pregnant or a home visit in depression of mothers. Associations of child internalizing problems with: maternal antenatal, postnatal, ante/post natal depression, and never depressed |
| **Instrument** | CBCL 2-3 |
| **Main Findings on Internalizing Problems** | Patterns in the intervention groups were similar. Children of never depressed mothers: lower scores of Internalizing measure compared to children of postnatally depressed mothers (p < 0.01; ES = 0.18) and antenatally/postnatally depressed mothers (p < 0.01; ES = 0.21). Children of never depressed mothers: lower probability of Internalizing deviant measure compared to children of postnatally depressed mothers (p < 0.01; ES = 0.15) and antenatally/postnatally depressed mothers (p < 0.01; ES = 0.23). |
| **Confounders** | Maternal HIV status, alcohol use, food insecurity, and baseline education |
| **Quality Assessment** | Good |
| Rescorla et al. (2011) | **Country** | 24 countries |
| **Language** | English |
| **Aims of Study** | International comparisons were conducted of preschool children’s behavioral and emotional problems as reported on the Child Behavior Checklist for Ages 1½–5 by parents in 24 societies. |
| **Type of Study** | Ecological study |
| **Sample** | 24 societies. 6 LMIC: China, Kosovo, Iran, Peru, Taiwan and Turkey |
| Rescorla et al. (2011) (cont.) | **Internalizing Problems** | Total scores for internalizing problems and for each syndrome |
|  | **Associations, comparisons, or pathways examined** | Comparisons of mean scores in 24 societies |
|  | **Instrument** | CBCL 1.5-5 |
|  | **Main Findings on Internalizing Problems** | Turkey was the second highest-scoring society on Anxious/Depressed and was fourth or fifth highest on the other three Internalizing syndromes. Internalizing, Externalizing, and the 13 narrow-band scales (seven syndrome scales, five DSM-oriented scales, and Stress Problems) all showed the same pattern of larger within society than between-society variation (i.e., their omnicultural standard deviations were much larger than the standard deviations of their omnicultural means) The six societies with the highest mean Internalizing scores (Singapore, Iran, Romania, Lithuania, Turkey, and Chile) did not differ from each other |
|  | **Confounders** | Not assessed |
|  | **Quality Assessment** | Good |

**References**

Albores-Gallo, L., Hernández-Guzmán, L., Hasfura-Buenaga, C., & Navarro-Luna, E. (2016). Consistencia interna y validez de criterio de la versión mexicana del Child Behavior Checklist 1.5-5 (CBCL/1.5-5). *Revista Chilena de Pediatría*, *87*(6), 455-462. <https://doi.org/https://doi.org/10.1016/j.rchipe.2016.05.009>

Bárrig Jó, P., & Alarcón Parco, D. (2017). Temperamento y competencia social en niños y niñas preescolares de San Juan de Lurigancho: un estudio preliminar. *Temperament and social competence in preschool children from San Juan de Lurigancho: a preliminary study.*, *23*(1), 75-88. <https://doi.org/10.24265/liberabit.2017.v23n1.05>

Cano, L. H., Acosta, M. N., & Pulido, A. (2018). Adaptación al español y validación de criterio de una escala para la tamización de problemas emocionales y del comportamiento en la primera infancia. *Adaptation to Spanish and criterion validity of a scale for the screening of emotional and behavioral problems in early childhood.*, 1-1. <https://doi.org/10.7705/biomedica.v38i0.3795>

Corapci, F., Smith, J., & Lozoff, B. (2006). The role of verbal competence and multiple risk on the internalizing behavior problems of Costa Rican youth. *Ann N Y Acad Sci*, *1094*, 278-281. <https://doi.org/10.1196/annals.1376.034>

El Rafihi-Ferreira, R., Ferreira de Mattos Silvares, E., Pires, M. L. N., Assumpção, F. B., Jr., & de Moura, C. B. (2016). Sono e comportamento em crianças atendidas em um Serviço de psicologia = Sleep and behavior in children assisted in a psychology service. *Psicologia: Teoria e Prática*, *18*(2), 159-172. <https://doi.org/10.15348/1980-6906/psicologia.v18n2p159-172>

Erol, N., Simsek, Z., Oner, O., & Munir, K. (2005). Behavioral and emotional problems among Turkish children at ages 2 to 3 years. *J Am Acad Child Adolesc Psychiatry*, *44*(1), 80-87. <https://doi.org/10.1097/01.chi.0000145234.18056.82>

Gil Rodríguez, L., Lucio Gómez Maqueo, E., & Forns i Santacana, M. (2018). Patrones de disponibilidad emocional y los problemas de salud mental del pre-escolar. *Acta de investigación psicológica*, *8*(1), 37-48. <https://doi.org/10.22201/fpsi.20074719e.2018.1.04>

Hesapcioglu, S. T., Ceylan, M. F., Erdogan, B., Kandemir, G., & Cop, E. (2017). Which psychiatric symptoms of the mother are related with preschool child’s emotional and behavioral problems? *Düşünen Adam: Journal of Psychiatry and Neurological Sciences*, *30*(1), 6-14. <https://doi.org/10.5350/DAJPN2017300101>

Kozlova, E. A., Slobodskaya, H. R., & Gartstein, M. A. (2019). Early temperament as a predictor of child mental health. *International Journal of Mental Health and Addiction*. <https://doi.org/10.1007/s11469-019-00181-3>

Lacunza, A. B. (2011). Habilidades sociales y comportamientos problemáticos en niños de nivel escolar inicial = Social skills and problematic behaviour in pre-school children. *Acta Psiquiátrica y Psicológica de América Latina*, *57*(3), 190-197. <https://ezproxy.cul.columbia.edu/login?qurl=https%3a%2f%2fsearch.ebscohost.com%2flogin.aspx%3fdirect%3dtrue%26db%3dpsyh%26AN%3d2011-23710-002%26site%3dehost-live%26scope%3dsite>

Liang, X., Liu, M., Wang, M., Yu, J., Wang, Z., & Lu, S. (2019). Infant withdrawal and behavior problems in urban Chinese toddlers: Roles of maternal sensitivity to infant distress and emerging delay ability. *Infant Mental Health Journal*, *40*(2), 248-262. <https://doi.org/10.1002/imhj.21763>

Lins, T., & Alvarenga, P. (2015). Controle Psicológico Materno e Problemas Internalizantes em Pré-Escolares = Maternal psychological control and internalizing problems of preschool children. *Psicologia: Teoria e Pesquisa*, *31*(3), 311-319. <https://doi.org/10.1590/0102-37722015032092311319>

Liu, J., Hanlon, A., Ma, C., Zhao, S. R., Cao, S., & Compher, C. (2014). Low blood zinc, iron, and other sociodemographic factors associated with behavior problems in preschoolers. *Nutrients*, *6*(2), 530-545. <https://doi.org/10.3390/nu6020530>

Liu, J., Leung, P. W. L., McCauley, L., Ai, Y., & Pinto-Martin, J. (2013). Mother's environmental tobacco smoke exposure during pregnancy and externalizing behavior problems in children. *Neurotoxicology*, *34*, 167-174. <http://dx.doi.org/10.1016/j.neuro.2012.11.005>

Liu, J., Liu, X., Wang, W., McCauley, L., Pinto-Martin, J., Wang, Y., Li, L., Yan, C., & Rogan, W. J. (2014). Blood lead concentrations and children's behavioral and emotional problems: a cohort study. *JAMA Pediatr*, *168*(8), 737-745. <http://dx.doi.org/10.1001/jamapediatrics.2014.332>

Liu, L., & Wang, M. (2015). Parenting stress and children's problem behavior in China: the mediating role of parental psychological aggression. *J Fam Psychol*, *29*(1), 20-28. <https://doi.org/10.1037/fam0000047>

Markovic, J., Rescorla, L., Okanovic, P., Maras, J. S., Bukurov, K. G., & Sekulic, S. (2016). Assessment of preschool psychopathology in Serbia. *Res Dev Disabil*, *49-50*, 216-225. <https://doi.org/10.1016/j.ridd.2015.11.027>

Matijasevich, A., Murray, E., Stein, A., Anselmi, L., Menezes, A. M., Santos, I. S., Barros, A. J., Gigante, D. P., Barros, F. C., & Victora, C. G. (2014). Increase in child behavior problems among urban Brazilian 4-year olds: 1993 and 2004 Pelotas birth cohorts. *J Child Psychol Psychiatry*, *55*(10), 1125-1134. <https://doi.org/10.1111/jcpp.12236>

Montoya Arenas, D. A., Vásquez, N. G., Arango Díaz, L., Forgiarini Rupp, R., & García Cardona, A. A. (2014). CARACTERÍSTICAS COGNITIVAS, EMOCIONALES Y CONDUCTUALES DE NIÑOS PREESCOLARES DEL PROGRAMA BUEN COMIENZO EN EL NOROCCIDENTE DE MEDELLÍN. *COGNITIVE, EMOTIONAL, AND BEHAVIORAL CHARACTERISTICS OF PRESCHOOLERS OF THE GOOD START PROGRAM IN THE NORTHWESTERN AREA IN MEDELLIN.*, *14*(2), 637-645. <https://doi.org/10.21500/16578031.38>

Pearson, R. M., Culpin, I., Loret de Mola, C., Matijasevich, A., Santos, I. S., Horta, B. L., Barros, F. C., & Stein, A. (2019). Grandmothers’ mental health is associated with grandchildren’s emotional and behavioral development: A three-generation prospective study in Brazil. *BMC Psychiatry*, *19*. <https://ezproxy.cul.columbia.edu/login?qurl=https%3a%2f%2fsearch.ebscohost.com%2flogin.aspx%3fdirect%3dtrue%26db%3dpsyh%26AN%3d2019-34500-001%26site%3dehost-live%26scope%3dsite>

Rescorla, L. A., Achenbach, T. M., Ivanova, M. Y., Harder, V. S., Otten, L., Bilenberg, N., Bjarnadottir, G., Capron, C., De Pauw, S. S. W., Dias, P., Dobrean, A., Döpfner, M., Duyme, M., Eapen, V., Erol, N., Esmaeili, E. M., Ezpeleta, L., Frigerio, A., Fung, D. S. S., . . . Verhulst, F. C. (2011). International comparisons of behavioral and emotional problems in preschool children: Parents' reports from 24 societies. *Journal of Clinical Child and Adolescent Psychology*, *40*(3), 456-467. <https://doi.org/10.1080/15374416.2011.563472>

Reyna, C., & Brussino, S. (2009). Propiedades Psicométricas de la Escala de Comportamiento Preescolar y Jardín Infantil en una Muestra de Niños Argentinos de 3 a 7 Años. *Psychometric Properties of the Preschool and Kindergarten Behavior Scales in a Sample of Argentinean Children from 3 to 7 Years Old.*, *18*(2), 127-140. <https://doi.org/10.4067/S0718-22282009000200009>

Rotheram-Fuller, E. J., Tomlinson, M., Scheffler, A., Weichle, T. W., Hayati Rezvan, P., Comulada, W. S., & Rotheram-Borus, M. J. (2018). Maternal patterns of antenatal and postnatal depressed mood and the impact on child health at 3-years postpartum. *J Consult Clin Psychol*, *86*(3), 218-230. <https://doi.org/10.1037/ccp0000281>

Santos, I. S., Barros, A. J., Barros, F. C., Munhoz, T. N., Da Silva, B. D. P., & Matijasevich, A. (2017). Mother-child bed-sharing trajectories and psychiatric disorders at the age of 6 years. *J Affect Disord*, *208*, 163-169. <https://doi.org/10.1016/j.jad.2016.08.054>

Santos, L. M. d., Queirós, F. C., Barreto, M. L., & Santos, D. N. d. (2015). Prevalence of behavior problems and associated factors in preschool children from the city of Salvador, state of Bahia, Brazil. *Brazilian Journal of Psychiatry*, *38*(1), 46-52. <https://doi.org/10.1590/1516-4446-2014-1596>

Ştefan, C. A., & Avram, J. (2017). Investigating direct and indirect effects of attachment on internalizing and externalizing problems through emotion regulation in a cross-sectional study. *Journal of Child and Family Studies*, *26*(8), 2311-2323. <https://doi.org/10.1007/s10826-017-0723-7>

Wasserman, G. A., Liu, X., Pine, D. S., & Graziano, J. H. (2001). Contribution of maternal smoking during pregnancy and lead exposure to early child behavior problems. *Neurotoxicology and Teratology*, *23*(1), 13-21. <https://doi.org/10.1016/S0892-0362(00)00116-1>

Yurdusen, S., Erol, N., & Gençöz, T. (2013). The effects of parental attitudes and mothers' psychological well-being on the emotional and behavioral problems of their preschool children. *Matern Child Health J*, *17*(1), 68-75. <http://dx.doi.org/10.1007/s10995-012-0946-6>

Zeanah, C. H., Egger, H. L., Smyke, A. T., Nelson, C. A., Fox, N. A., Marshall, P. J., & Guthrie, D. (2009). Institutional rearing and psychiatric disorders in Romanian preschool children. *The American Journal of Psychiatry*, *166*(7), 777-785. <https://doi.org/10.1176/appi.ajp.2009.08091438>
